# Supplementary material for: Calcium oxalate precipitation by diffusion using laminar microfluidics: toward a biomimetic model of pathological microcalcifications
Source: Royal Society of Chemistry journal article supplement (doi:10.1039/c6lc00197a), 2016-01-01
Supplement: c6lc00197a1.pdf [file c6lc00197a1.pdf]

## Electronic Supplementary Information

### Calcium oxalate precipitation by diffusion using laminar microfluidics: toward a biomimetic model of pathological microcalcifications

G. Laffite<sup>ab</sup>, C. Bonhomme<sup>b</sup>, C. Leroy<sup>b</sup>, L. Bonhomme-Coury<sup>b</sup>, E. Letavernier<sup>c</sup>, M. Daudon<sup>c</sup>, V. Frochot<sup>c</sup>, JP Haymann<sup>c</sup>, S. Rouzière<sup>d</sup>, I. T. Lucas,<sup>e</sup> D. Bazin<sup>bd</sup> F. Babonneau<sup>b</sup> and A. Abou-Hassan<sup>\*a</sup>

<sup>a</sup> Sorbonne Universités, UPMC Univ Paris 06, UMR 8234 CNRS, Laboratoire Physico-chimie des Electrolytes, Nanosystèmes Interfaciaux (PHENIX), 4 place Jussieu - case 51, F-75005, Paris, France.

<sup>b</sup> Sorbonne Universités, UPMC Univ Paris 06, CNRS, Collège de France, Laboratoire de Chimie de la Matière Condensée de Paris (LCMCP), 11 Place Marcelin Berthelot, Bat D, F-75005, Paris, France.

<sup>c</sup> Sorbonne Universités, UPMC Univ Paris 06, AP-HP, INSERM, Service d'Explorations Fonctionnelles, Hôpital Tenon, 4 rue de la Chine, 75020, Paris, France.

<sup>d</sup> Laboratoire de Physique des Solides, CNRS UMR 8502, Université Paris-Sud, Bât 510, 91405, Orsay, France.

<sup>e</sup> Sorbonne Universités, UPMC Univ Paris 06, UMR 8235 CNRS, Laboratoire Interfaces et Systèmes Electrochimiques (LISE), 4 place Jussieu – case 133, F-75005, Paris, France.

\*Corresponding author: [ali.abou\\_hassan@upmc.fr](mailto:ali.abou_hassan@upmc.fr)

#### 1. Chemicals

Calcium chloride and sodium oxalate salts were respectively purchased from Merck and Prolabo and used as received.

#### 2. Microfluidic device fabrication

The PDMS microchannels were produced using a standard soft lithographic process<sup>1</sup> briefly described in the following. In a first step, a rigid mold containing the “Y shaped” pattern was fabricated on a <100> oriented silicon wafer using a SU8 2100 photoresist (Micro- Chem Corp) suitable for the design of 100 μm in depth microstructures. For the mold replication, a liquid elastomer base (Sylgard, 184, Dow Corning) was manually mixed with its curing agent in a proportion of 10:1 (w/w). The mixture was then degassed in a vacuum chamber during 1 h, poured on the silicon mold and cured in an oven at 65 °C during 2 h. Finally, the PDMS containing the replicated pattern was carefully peeled off from the silicon mold and holes used for liquids injection were manually punched.

#### 3. COMSOL simulations

The distribution of calcium and oxalate species at 25°C in the channel was modelled in the convection and diffusion modes using the steady-state incompressible *Navier-Stokes* equation using the chemical engineering module of COMSOL Multiphysics 4.2.

The mass balance equation implemented in the convection and diffusion application mode is given by:

$$\nabla \cdot (-D_i \nabla c_i) = -u \nabla \cdot c_i \quad (1)$$

where  $c_i$  is the concentration of species  $i$  ( $c_{oxalate}=12.0 \text{ mmol.L}^{-1}$  and  $c_{calcium}=0.40 \text{ mmol.L}^{-1}$ ),  $D_i$  is the self-diffusion constants of species  $i$  at infinite dilution in water at 25°C ( $D_{oxalate} = 9.87 \times 10^{-10} \text{ m}^2.\text{s}^{-1}$  and  $D_{calcium} = 7.92 \times 10^{-10} \text{ m}^2.\text{s}^{-1}$  from ref<sup>2</sup>) and  $u$  is the velocity vector ( $\text{m}.\text{s}^{-1}$ ).

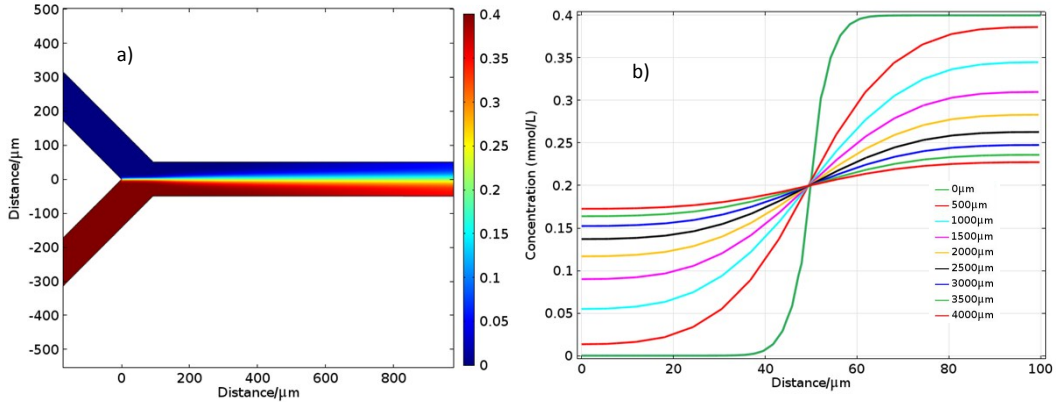

**Fig. S1.** Simulated calcium concentration distribution at a flow rate  $Q_{calcium}$  of  $1 \mu\text{L}.\text{min}^{-1}$ : concentration distribution of calcium (a) and concentration profile of calcium (b) as a function of the transverse coordinate of the microchannel at different distance away from the junction. The concentration gradient is displayed as a color gradient from 0 (blue) to 0.4 (red).

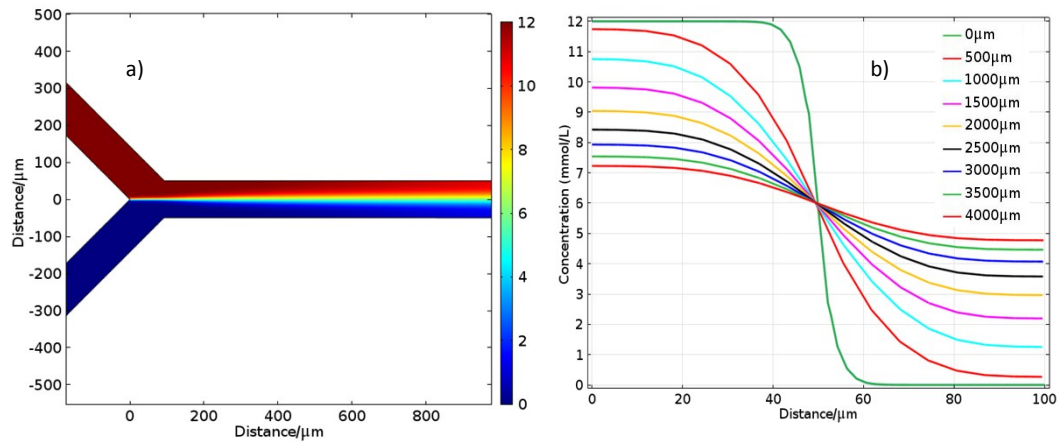

**Fig. S2.** Simulated oxalate concentration distribution at a flow rate  $Q_{oxalate}$  of  $1 \mu\text{L}.\text{min}^{-1}$ : concentration distribution of oxalate (a) and concentration profile of oxalate (b) as a function of the transverse coordinate of the microchannel at different distance away from the junction. The concentration gradient is displayed as a color gradient from 0 (blue) to 12 (red).

Finally the supersaturation (SS) gradients were also simulated in the microchannel using the following definition :<sup>3</sup>

$$SS = \frac{c_{oxalate} \times c_{calcium}}{c_{oxalate}^{eq} \times c_{calcium}^{eq}} \quad (2)$$

where  $c_{oxalate}^{eq}$  and  $c_{calcium}^{eq}$  are the concentration of oxalate and calcium at equilibrium, respectively (*i.e* the solubility at 25°C is about 4mg/L or  $3.1 \times 10^{-2} \text{ mmol.L}^{-1}$ ).<sup>4</sup>

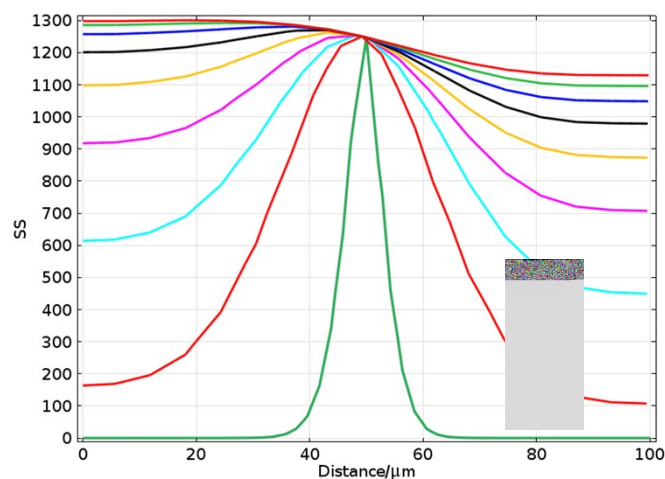

**Fig. S3.** Supersaturation (SS) profile distribution during mixing in the channel at flow rates  $Q_{\text{oxalate}}$  and  $Q_{\text{calcium}}$  of  $1 \mu\text{L}\cdot\text{min}^{-1}$  as a function of the transverse coordinate of the microchannel at different distance away from the junction.

## 4. Experimental

### 4.1 Raman scattering

Raman spectra with a  $0.5 \text{ cm}^{-1}$  spectral resolution were collected during 30s on a Labram HR800 instrument (Horiba, Japan) with a Newton EM-CCD (Andor technology, UK) using a 633nm excitation laser (1 mW) and a 100x objective (Olympus, Japan). Raman maps ( $80 \times 60 \mu\text{m}$ ) with a  $2\mu\text{m}$  step were acquired under similar conditions using a 0.25 s collection time *per* pixel.

### 4.2 X-ray diffraction

X-ray diffraction measurements were performed on a MARdth goniometer installed on a copper rotating anode generator with monochromatized radiation (wavelength =  $1.542 \text{ \AA}$ ) obtained by a multilayer W/Si optics. The microscope glass slide with the precipitated crystals was placed between the beam collimation slits and the detector. Diffraction patterns were recorded on a MAR research X-ray sensitive 345 mm plate detector with  $150\mu\text{m}$  pixel size. Home-made software allows for the angular grouping of measured intensities to obtain scattering diagrams  $I(Q)$ .

### 4.3 Infrared spectroscopy

FT-IR spectra were recorded directly on the microchannel equipped with a metallized glass slide, using a Perkin-Elmer FT-IR Frontier spectrometer coupled with a Perkin-Elmer FT-IR Spotlight 400 microscope.

## 5. Results

### 5.1 X-ray diffraction (XRD)

The observed 2D X-ray diffraction diagram in Fig. S4a reveals rings and dots, underlining the presence of quite large crystals in the microfluidic channel (as confirmed by SEM – see Fig. 2 in the main text). However, the non-flat base line observed on the spectrum in Fig. S4b is a consequence of the high scattering due to the glass slide substrate. Characteristic high intensity peaks ( $\text{AU} > 50 \%$ ) specific for the COM phase can be extracted for angles at  $14.95^\circ$ ,  $24.43^\circ$ ,  $30.2^\circ$  (space group  $P2_1/c$ ;  $a=6.283\text{\AA}$ ;  $b=14.560\text{\AA}$ ;  $c=10.116\text{\AA}$ ;  $\beta = 109.59^\circ$ ). The use of Kapton® film rather than glass slide (more suitable for XRD experiments) is currently under investigation.

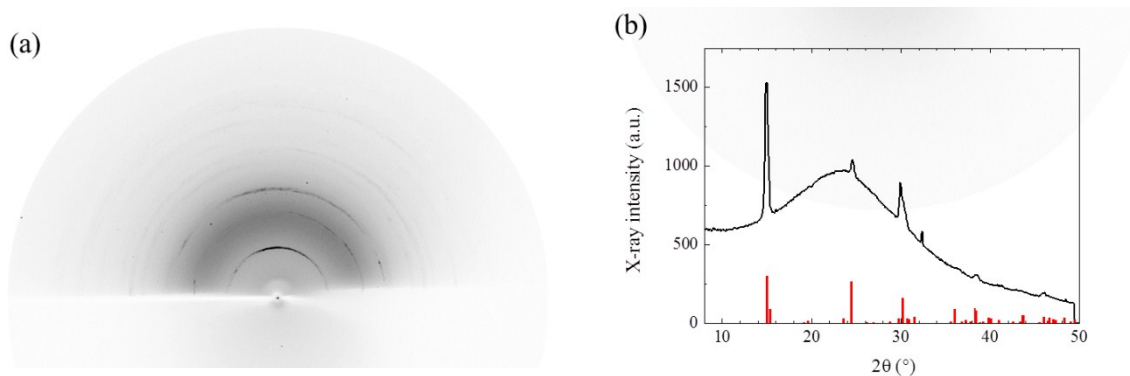

**Fig S4.** a) 2-D X-ray diffraction pattern of the precipitated crystals obtained on the microscope glass slide in the microfluidic device. b) Associated X-Ray diagram with characteristic peaks of COM phase, red lines indicating the tabulated values.

## 5.2 FT-IR experiments

FT-IR spectrum (Fig. S5a) recorded in the upper region of the microchannel where mainly only twinned crystals were observed (Fig. S2), presents weak but rather well defined bands in the 3000-3500  $\text{cm}^{-1}$  region ( $\nu(\text{OH})$ ), strong  $\nu(\text{C-O})$  bands at 1606  $\text{cm}^{-1}$  and 1312  $\text{cm}^{-1}$ , the out of plane bending mode of water at 776  $\text{cm}^{-1}$  and a weak adsorption band at 883  $\text{cm}^{-1}$  demonstrating the presence of COM phase (in agreement with the observed crystal morphology).<sup>5</sup> FT-IR spectrum (Fig. S5b) recorded in the lower region of the microchannel where tapered bipyramids were also present, shows much broader bands, especially in the  $\nu(\text{OH})$  region, which is characteristic of the COD phase. However the low signal-to-noise ratio prevents any definitive identification<sup>4</sup>.

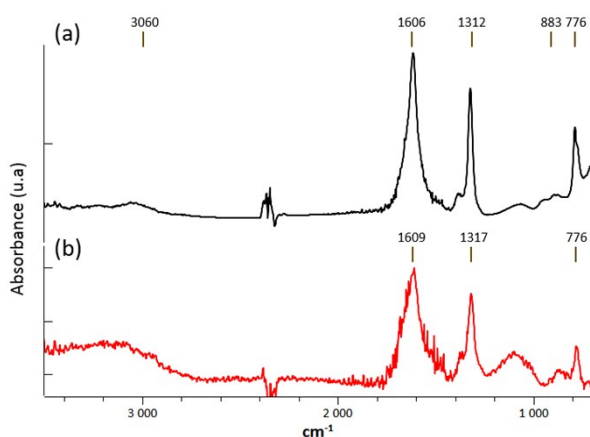

**Fig. S5.** ATR FT-IR spectra of precipitated crystals formed in a) the upper region and b) the lower region of the microchannel (see Figure 2 in the main text).

## References:

1. Y. X. and G. M. Whitesides, *Annual Review of Materials Science*, 1998, **28**, 153-184.
2. J. Buffle, Z. Zhang and K. Startchev, *Environmental Science & Technology*, 2007, **41**, 7609-7620.
3. B. Finlayson, *Kidney Int*, 1978, **13**, 344-360.
4. S. S. Atanassova and I. S. Gutzow, *Biomed. Res. Int.*, 2013, 374950.
5. P. Carmona, J. Bellanato and E. Escolar, *Biospectroscopy*, 1997, **3**, 331-346.
